# Supplementary material for: Εleven Greek Legume Beans: Assessment of Genotypic Effect on Their Phytochemical Content and Antioxidant Properties
Source: MDPI journal article supplement (doi:10.3390/antiox13040459), 2024-04-13
Supplement: s1 [file s1]

# Eleven Greek legume beans: Assessment of genotypic effect on their phytochemical content and antioxidant properties

Eleni D. Myrtsi, Dimitrios N. Vlachostergios, Christos Petsoulas, Sofia D. Koulocheri, Epameinondas Evergetis and Serkos A. Haroutounian\*

## Supplementary Material

**Table S1.** Retention time (RT), calibration curve equation and determination coefficient ( $R^2$ ) of each fatty acid.

**Table S2.** Fatty acids composition (mg/g extract) of investigated cultivars: *Cicer arietinum* and *Pisum sativum*.

**Table S3.** Fatty acids composition (mg/g extract) of investigated cultivars: *Vicia faba*, *Phaseolus vulgaris* and *Lens culinaris*.

**Table S4.** Transition, collision energy, polarity, retention time (RT), calibration curve equation and determination coefficient of each analyte.

**Figure S1:** Matrix of the Pearson correlation coefficients.

**Figure S2** Correlation heatmap depicting the relationships between phytochemical components and antioxidant properties.

**Table S1.** Retention time (RT), calibration curve equation, and determination coefficient (R<sup>2</sup>) of each fatty acid.

| Fatty Acid                               | RT (min) | Equation               | R <sup>2</sup> |
|------------------------------------------|----------|------------------------|----------------|
| Butyric Acid                             | 4.10     | $y=5.43776+1.81190x$   | 0.9990         |
| Caproic acid                             | 5.21     | $y=-0.32585+2.19335x$  | 0.9990         |
| Caprylic acid                            | 6.33     | $y=1.83230+2.45992x$   | 0.9992         |
| Capric acid                              | 7.40     | $y=4.62271+2.62696x$   | 0.9990         |
| Undecanoic acid                          | 7.95     | $y=2.18465+2.72111x$   | 0.9990         |
| Lauric acid                              | 8.56     | $y=3.92115+2.76115x$   | 0.9994         |
| Tridecanoic acid                         | 9.23     | $y=3.78551+2.70616x$   | 0.9992         |
| Myristic acid                            | 10.04    | $y=11.43893+2.62566x$  | 0.9991         |
| Myristoleic acid                         | 10.52    | $y=5.60554+2.62292x$   | 0.9991         |
| Pentadecanoic acid                       | 10.95    | $y=6.88948+2.58981x$   | 0.9990         |
| cis-10-Pentadecenoic acid                | 11.64    | $y=6.53148+2.60193x$   | 0.9990         |
| Palmitic acid                            | 11.98    | $y=17.49106+2.59396x$  | 0.9992         |
| Palmitoleic acid                         | 12.26    | $y=6.01822+2.57637x$   | 0.9992         |
| Margaric acid                            | 12.97    | $y=5.61680+2.52989x$   | 0.9990         |
| cis-10-Heptadecenoic acid                | 13.26    | $y=5.60661+2.58709x$   | 0.9990         |
| Stearic acid                             | 14.10    | $y=11.61671+2.58183x$  | 0.9993         |
| Oleic acid                               | 14.39    | $y=16.92763+2.57653x$  | 0.9992         |
| Linoleic acid                            | 15.05    | $y=6.21919+2.50695x$   | 0.9993         |
| Linolenic acid                           | 15.49    | $y=3.36202+2.43641x$   | 0.9994         |
| Linolelaidic acid                        | 16.01    | $y=3.05237+2.44261x$   | 0.9993         |
| Arachidic acid                           | 17.01    | $y=5.38288+2.61615x$   | 0.9994         |
| cis-11-Eicosenoic acid                   | 17.44    | $y=3.58500+2.57952x$   | 0.9995         |
| cis-11,14-Eicosadienoic acid             | 18.34    | $y=1.96961+2.50940x$   | 0.9990         |
| Heneicosanoic acid                       | 18.84    | $y=-8.40315+1.84368x$  | 0.9991         |
| cis-11,14,17-Eicosatrienoic acid         | 19.28    | $y=-11.10622+1.42617x$ | 0.9983         |
| cis-5,8,11,14,17-Eicosapentaenoic acid   | 19.59    | $y=4.48371+2.38905x$   | 0.9991         |
| Arachidonic acid                         | 20.75    | $y=4.24675+2.28699x$   | 0.9991         |
| Behenic acid                             | 20.77    | $y=8.15731+3.70587x$   | 0.9990         |
| Erucic acid                              | 21.27    | $y=4.69676+2.52971x$   | 0.9991         |
| cis-13,16-Docosadienoic aci              | 22.37    | $y=6.27324+2.41700x$   | 0.9994         |
| Tricosanoic acid                         | 23.09    | $y=1.88253+2.54624x$   | 0.9997         |
| Lignoceric acid                          | 25.99    | $y=3.94197+2.51159x$   | 0.9991         |
| cis-4,7,10,13,16,19-Docosahexaenoic acid | 26.77    | $y=-8.77566+3.26195x$  | 0.9982         |
| Nervonic Acid                            | 26.88    | $y=-9.56931+1.30621x$  | 0.9982         |

**Table S2.** Fatty acids composition (mg/g extract) of investigated cultivars: *Cicer arietinum* and *Pisum sativum*.

| Compounds                                 | CAA          | CAG            | CAT            | PSO           | PSD           |
|-------------------------------------------|--------------|----------------|----------------|---------------|---------------|
| <i>Saturated Fatty Acid (SFA)</i>         |              |                |                |               |               |
| Caproic acid                              | nd           | nd             | nd             | nd            | nd            |
| Caprylic acid                             | nd           | nd             | nd             | nd            | 0.044±0.004   |
| Capric acid                               | nd           | nd             | nd             | nd            | 0.002±0.001   |
| Lauric acid                               | nd           | 0.024±0.002    | 0.030±0.005    | 0.016±0.001   | 0.182±0.014   |
| Tridecanoic acid                          | nd           | nd             | nd             | 0.009±0.000   | 0.007±0.002   |
| Myristic acid                             | 0.376±0.004  | 0.785±0.044    | 1.260±0.102    | 1.040±0.021   | 2.223±0.137   |
| Pentadecanoic acid                        | 0.093±0.000  | nd             | nd             | 0.484±0.000   | 0.538±0.032   |
| Palmitic acid                             | 21.129±0.023 | 0.307±0.015    | 0.423±0.023    | 29.438±0.587  | 58.827±0.798  |
| Margaric acid                             | 0.075±0.006  | 0.830±0.042    | 1.665±0.015    | 0.321±0.015   | 0.524±0.024   |
| Stearic acid                              | 2.812±0.056  | 0.316±0.014    | 0.603±0.033    | 9.759±0.743   | 18.991±0.738  |
| Arachidic acid                            | 1.062±0.018  | 13.305±0.613   | 17.692±1.763   | 2.000±0.219   | 1.765±0.124   |
| Heneicosanoic acid                        | 0.200±0.000  | 0.320±0.022    | 0.474±0.079    | 0.420±0.035   | 0.394±0.024   |
| Behenic acid                              | 0.33±0.004   | 0.844±0.046    | 0.595±0.091    | 0.351±0.062   | 0.281±0.032   |
| Tricosanoic acid                          | 0.184±0.097  | 0.471±0.031    | 0.490±0.099    | 0.210±0.039   | 0.314±0.033   |
| Lignoceric acid                           | 0.281±0.004  | 0.558±0.040    | 0.459±0.081    | 0.632±0.102   | nd            |
| <i>Mono Unsaturated Fatty Acid (MUFA)</i> |              |                |                |               |               |
| Palmitoleic acid                          | 0.431±0.061  | 62.965±2.285   | 70.364±0.108   | 0.396±0.006   | 1.915±0.088   |
| <i>cis</i> -10-Heptadecenoic acid         | 0.131±0.001  | 0.635±0.029    | 0.404±0.028    | nd            | 0.265±0.013   |
| Oleic acid                                | 55.92±0.879  | 18.757±1.960   | nd             | 54.741±2.969  | 147.208±6.757 |
| <i>cis</i> -11-Eicosenoic acid            | 0.812±0.073  | 19.137±1.101   | 5.114±0.967    | 1.221±0.145   | 1.161±0.074   |
| Erucic acid                               | 0.222±0.007  | 3.591±0.247    | 1.816±0.356    | 1.205±0.16    | 0.794±0.078   |
| <i>Poly Unsaturated Fatty Acid (PUFA)</i> |              |                |                |               |               |
| Linoleic acid                             | 4.115±0.382  | 193.066±5.937  | 212.420±6.532  | 159.934±8.782 | 187.511±8.856 |
| Linolenic acid                            | 6.019±0.088  | 304.018±13.827 | 334.494±15.213 | 36.869±2.158  | 33.243±1.596  |
| <i>cis</i> -11,14-Eicosadienoic acid      | 0.119±0.002  | 2.139±0.120    | 3.795±0.681    | 0.276±0.032   | 1.563±0.136   |
| <b>SFAs (% of total Fatty Acids)</b>      | 28.14        | 2.85           | 3.63           | 14.93         | 18.37         |
| <b>MUFAs (% of total Fatty Acids)</b>     | 60.99        | 16.89          | 11.92          | 19.23         | 33.06         |
| <b>PUFAs (% of total Fatty Acids)</b>     | 10.87        | 80.25          | 84.45          | 65.84         | 48.57         |

<sup>1</sup> nd: not detected.

**Table S3.** Fatty acids composition (mg/g extract) of investigated cultivars: *Vicia faba*, *Phaseolus vulgaris* and *Lens culinaris*.

| Compounds                                 | VFP            | VFT            | PVP           | LCD           | LCT           | LCS            |
|-------------------------------------------|----------------|----------------|---------------|---------------|---------------|----------------|
| <i>Saturated Fatty Acid (SFA)</i>         |                |                |               |               |               |                |
| Caproic acid                              | nd             | nd             | nd            | nd            | 0.685±0.004   | nd             |
| Caprylic acid                             | nd             | nd             | nd            | nd            | nd            | nd             |
| Capric acid                               | nd             | nd             | nd            | nd            | nd            | nd             |
| Lauric acid                               | 0.052±0.013    | 0.073±0.007    | 0.020±0.002   | 0.517±0.005   | 0.030±0.000   | 0.078±0.008    |
| Tridecanoic acid                          | 0.019±0.008    | 0.069±0.008    | nd            | 0.126±0.002   | nd            | 0.025±0.004    |
| Myristic acid                             | 1.518±0.200    | 4.207±0.198    | 0.625±0.028   | 3.911±0.004   | 2.613±0.022   | 1.866±0.160    |
| Pentadecanoic acid                        | 0.591±0.07     | 1.156±0.066    | 0.601±0.022   | 0.98±0.017    | 0.664±0.003   | 0.443±0.047    |
| Palmitic acid                             | 39.678±4.248   | 74.868±3.675   | 43.105±1.299  | 67.187±0.066  | 46.549±0.440  | 31.751±3.111   |
| Margaric acid                             | 0.289±0.044    | 0.522±0.028    | 0.521±0.014   | 0.536±0.001   | 0.315±0.003   | 0.285±0.034    |
| Stearic acid                              | 7.679±1.147    | 14.513±0.444   | 9.079±0.191   | 12.858±0.110  | 6.309±0.055   | 5.778±0.590    |
| Arachidic acid                            | 4.424±0.607    | 9.633±0.118    | 2.409±0.021   | 7.456±0.027   | 3.804±0.052   | 3.397±0.329    |
| Heneicosanoic acid                        | 0.986±0.115    | 1.869±0.000    | 0.586±0.000   | 3.462±0.015   | 1.771±0.021   | 1.493±0.115    |
| Behenic acid                              | 1.343±0.214    | 2.926±0.061    | 1.931±0.025   | 4.347±0.047   | 2.111±0.030   | 1.854±0.131    |
| Tricosanoic acid                          | 0.571±0.096    | 1.165±0.039    | 1.258±0.015   | nd            | nd            | nd             |
| Lignoceric acid                           | 1.103±0.181    | 2.24±0.133     | 3.475±0.139   | nd            | nd            | nd             |
| <i>Mono Unsaturated Fatty Acid (MUFA)</i> |                |                |               |               |               |                |
| Palmitoleic acid                          | 0.435±0.056    | 0.473±0.025    | 1.269±0.062   | 0.785±0.004   | 0.503±0.010   | 0.333±0.046    |
| <i>cis</i> -10-Heptadecenoic acid         | nd             | nd             | 0.379±0.01    | nd            | 0.284±0.002   | 0.174±0.024    |
| Oleic acid                                | 64.416±8.733   | 110.877±4.155  | 42.973±0.22   | 63.927±0.367  | 74.496±0.146  | 34.063±3.508   |
| <i>cis</i> -11-Eicosenoic acid            | 1.762±0.45     | 3.189±0.050    | 0.746±0.007   | 4.134±0.009   | 3.957±0.130   | 2.062±0.212    |
| Erucic acid                               | 0.492±0.077    | 0.736±0.006    | 0.468±0.001   | nd            | nd            | nd             |
| <i>Poly Unsaturated Fatty Acid (PUFA)</i> |                |                |               |               |               |                |
| Linoleic acid                             | 149.372±18.478 | 291.238±10.950 | 147.758±2.988 | 202.756±1.318 | 206.005±1.694 | 106.097±10.734 |
| Linolenic acid                            | 15.621±1.969   | 31.364±1.146   | 130.988±6.073 | 57.981±0.478  | 62.856±0.515  | 36.308±3.669   |
| <i>cis</i> -11,14-Eicosadienoic acid      | 0.341±0.05     | 0.670±0.024    | 0.168±0.002   | 0.587±0.023   | 0.491±0.121   | 0.261±0.032    |
| <b>SFAs (% of total Fatty Acids)</b>      | 20.04          | 20.52          | 16.38         | 23.49         | 15.69         | 20.76          |
| <b>MUFAs (% of total Fatty Acids)</b>     | 23.08          | 20.89          | 11.80         | 15.95         | 19.17         | 16.19          |
| <b>PUFAs (% of total Fatty Acids)</b>     | 56.88          | 58.59          | 71.82         | 60.55         | 65.15         | 63.05          |

<sup>1</sup> nd: not detected.

**Table S4.** Transition, collision energy, polarity, retention time (RT), calibration curve equation, determination coefficient of each analyte.

| Compound                 | Parent Mass | Product Mass | Collision Energy (eV) | Polarity | RT (min) | Equation                              | R2     |
|--------------------------|-------------|--------------|-----------------------|----------|----------|---------------------------------------|--------|
| <i>Phenolic acids</i>    |             |              |                       |          |          |                                       |        |
| Caffeic acid             | 180.046     | 135.902      | 19                    | (-)      | 3.89     | $y=2.45545 \times 10^{-05}+0.807048x$ | 0.9997 |
| Chlorogenic acid         | 354.158     | 191.689      | 22                    | (-)      | 2.36     | $y=0.00237338+0.0463491x$             | 0.9992 |
| Gallic acid              | 170.064     | 126.042      | 18                    | (-)      | 2.05     | $y=-0.000909657+0.248304x$            | 0.9996 |
| Neochlorogenic acid      | 354.180     | 190.875      | 21                    | (-)      | 2.04     | $y=0.00110944+0.330727x$              | 0.9996 |
| p-Coumaric acid          | 163.994     | 119.995      | 18                    | (-)      | 6.16     | $y=0.00253174+0.386656x$              | 0.9998 |
| Protocatechuic acid      | 154.055     | 109.992      | 18                    | (-)      | 2.37     | $y=0.00114193+0.336255x$              | 0.9996 |
| Sinapic acid             | 224.081     | 208.913      | 16                    | (-)      | 6.78     | $y=0.00292367+0.00171603x$            | 0.9999 |
| <i>Flavonoids</i>        |             |              |                       |          |          |                                       |        |
| Apigenin                 | 269.982     | 118.164      | 42                    | (-)      | 16.98    | $y=-0.000697875+1.44417x$             | 0.9995 |
| Catechin                 | 290.147     | 204.072      | 21                    | (-)      | 2.9      | $y=0.0467805+0.934157x$               | 0.9996 |
| Diosmetin                | 300.276     | 284.940      | 20                    | (-)      | 17.67    | $y=-0.0358838+5.72414x$               | 0.9993 |
| Diosmin                  | 608.363     | 607.571      | 13                    | (-)      | 8.1      | $y=-0.000612353+0.15086x$             | 0.9998 |
|                          |             | 284.091      |                       |          |          |                                       |        |
| Epicatechin              | 290.159     | 246.261      | 18                    | (-)      | 3.57     | $y=-0.116752+4.45105x$                | 0.9995 |
| Epigallocatechin         | 306.193     | 125.032      | 29                    | (-)      | 2.47     | $y=0.000673414+0.0284518x$            | 0.9997 |
| Epigallocatechin gallate | 458.179     | 168.798      | 21                    | (-)      | 3.44     | $y=-0.0193777+0.909754x$              | 0.9993 |
| Eriodictyol              | 288.199     | 151.221      | 17                    | (-)      | 12.67    | $y=-0.00580681+0.335251x$             | 0.9996 |
| Gallocatechin            | 306.149     | 125.017      | 24                    | (-)      | 2.23     | $y=6.84895 \times 10^{-6}+0.223507x$  | 0.9997 |
| Hesperidin               | 610.143     | 301.669      | 26                    | (-)      | 7.78     | $y=-0.000990985+0.200653x$            | 0.9999 |
| Hesperetin               | 302.109     | 286.972      | 20                    | (-)      | 17.37    | $y=-0.00283134+2.37119x$              | 1.0000 |
| Isoquercetin             | 464.047     | 300.702      | 27                    | (-)      | 6.42     | $y=-9.13155 \times 10^{-5}+0.017002x$ | 0.9996 |
| Isorhamnetin             | 316.080     | 300.976      | 24                    | (-)      | 18.08    | $y=3.31994 \times 10^{-5}+0.0163076x$ | 0.9991 |
| Kaempferol               | 286.099     | 240.018      | 31                    | (-)      | 17.46    | $y=0.00954223+0.0127002x$             | 0.9999 |
| Liquiritigenin           | 256.166     | 135.040      | 18                    | (-)      | 12.64    | $y=0.0106373+0.516127x$               | 0.9997 |
| Liquiritin               | 418.213     | 256.024      | 24                    | (-)      | 5.96     | $y=-0.000116163+0.787945x$            | 0.9994 |
| Luteolin                 | 286.139     | 132.980      | 36                    | (-)      | 13.74    | $y=0.000771555+1.10749x$              | 0.9991 |
| Luteolin-4'-O-glucoside  | 448.270     | 284.878      | 21                    | (-)      | 8.62     | $y=0.220464+28.9004x$                 | 0.9994 |
| Myricetin                | 318.121     | 150.835      | 26                    | (-)      | 9.85     | $y=-0.00277692+0.21372x$              | 0.9992 |
| Pelargonidin             | 271.042     | 121.024      | 33                    | (+)      | 5.20     | $y=-0.1191133+10.7511356x$            | 0.9995 |

| Compound                     | Parent Mass | Product Mass | Collision Energy (eV) | Polarity | RT (min) | Equation                               | R2     |
|------------------------------|-------------|--------------|-----------------------|----------|----------|----------------------------------------|--------|
| Pelargonin                   | 595.241     | 270.881      | 33                    | (+)      | 2.05     | $y=0.709165842+229.621287x$            | 0.9998 |
| Procyanidin B1               | 578.342     | 407.739      | 25                    | (-)      | 2.3      | $y=-0.00010714+0.0256914x$             | 0.9995 |
| Procyanidin B2               | 578.319     | 408.253      | 29                    | (-)      | 2.83     | $y=-5.53133 \times 10^{-5}+0.03031x$   | 0.9995 |
| Quercetagetin                | 318.121     | 139.101      | 32                    | (-)      | 8.49     | $y=-0.0184825+1.55459x$                | 0.9993 |
| Quercetagetin-7-O-glucoside  | 480.253     | 317.676      | 25                    | (-)      | 3.91     | $y=-0.0195021+1.5577x$                 | 0.9996 |
| Quercetin                    | 302.104     | 151.049      | 25                    | (-)      | 13.74    | $y=0.000893219+0.280044x$              | 0.9995 |
| Quercitrin                   | 448.181     | 300.721      | 28                    | (-)      | 8.3      | $y=-0.00056989+0.0201204x$             | 0.9995 |
| Rhamnetin                    | 316.116     | 165.526      | 25                    | (-)      | 20.58    | $y=-2.61552 \times 10^{-5}+0.0153129x$ | 0.9990 |
| Rutin                        | 610.299     | 300.561      | 36                    | (-)      | 5.38     | $y=0.0749463+3.00856x$                 | 0.9996 |
| Taxifolin                    | 304.097     | 285.981      | 15                    | (-)      | 7.19     | $y=-0.000156342+0.241233x$             | 0.9998 |
| <i>Isoflavonoids</i>         |             |              |                       |          |          |                                        |        |
| 3'.4'.7-trihydroxyisoflavone | 270.133     | 242.060      | 24                    | (-)      | 9.01     | $y=-0.00283483+0.618479x$              | 0.9991 |
| 4'.6.7-Trihydroxyisoflavone  | 270.124     | 240.996      | 31                    | (-)      | 9.66     | $y=-0.00213213+0.379464x$              | 0.9984 |
| Biochanin A                  | 284.126     | 268.756      | 21                    | (-)      | 25.08    | $y=0.000605632+3.02904x$               | 0.9995 |
| Calycosin                    | 284.134     | 268.921      | 21                    | (-)      | 13.29    | $y=-0.0561721+5.79216x$                | 0.9998 |
| Calycosin-7-O-D-glycoside    | 446.305     | 445.555      | 14                    | (+)      | 10.97    | $y=-0.000130129+0.0799105x$            | 0.9996 |
|                              |             | 368.002      |                       |          |          |                                        |        |
| Daidzein                     | 254.287     | 253.568      | 15                    | (-)      | 12.12    | $y=-0.000638938+2.11645x$              | 0.9995 |
| Daidzein-7-O-glucuronide     | 430.263     | 253.987      | 32                    | (-)      | 4.15     | $y=0.000207851+0.125476x$              | 0.9991 |
| Daidzin                      | 416.715     | 254.790      | 26                    | (+)      | 4.02     | $y=0.000401047+0.0236351x$             | 0.9991 |
| Equol                        | 242.265     | 121.522      | 17                    | (-)      | 16.38    | $y=-0.00044859+0.00040563x$            | 0.9991 |
| Formononetin                 | 268.159     | 252.919      | 23                    | (-)      | 19.69    | $y=0.00594119+2.83806x$                | 0.9992 |
| Genistein                    | 270.132     | 133.827      | 37                    | (-)      | 16.66    | $y=0.0236043+0.993835x$                | 0.9991 |
| Genistein-7-O-glucuronide    | 446.250     | 268.842      | 31                    | (-)      | 7.32     | $y=-0.0350294+0.0875658x$              | 0.9999 |
| Genistin                     | 432.258     | 268.887      | 32                    | (-)      | 8.43     | $y=-0.000522399+0.187494x$             | 0.9992 |
| Glycitein                    | 284.179     | 268.649      | 24                    | (-)      | 13.42    | $y=-0.000280969+2.77789x$              | 0.9994 |
| Glycitin                     | 446.797     | 284.768      | 26                    | (+)      | 5.21     | $y=-4.05352+1140.78x$                  | 0.9991 |
| Ononin                       | 430.731     | 268.785      | 21                    | (+)      | 10.24    | $y=-0.00378502+0.19401x$               | 0.9999 |
| Puerarin                     | 416.220     | 295.606      | 24                    | (-)      | 2.79     | $y=-0.0588534+3.08771x$                | 0.9998 |
| Sissotrin                    | 446.327     | 283.857      | 22                    | (-)      | 14.06    | $y=-0.00038752+0.0815812x$             | 0.9996 |
| Sophoricoside                | 432.293     | 431.568      | 19                    | (-)      | 8.3      | $y=0.002776293+1.036527x$              | 0.9997 |
|                              |             | 270.134      |                       |          |          |                                        |        |
| <i>Chalconoids</i>           |             |              |                       |          |          |                                        |        |
| Isoliquiritigenin            | 256.154     | 120.019      | 29                    | (-)      | 19.67    | $y=-0.000802473+1.59052x$              | 0.9996 |

| Compound             | Parent Mass | Product Mass | Collision Energy (eV) | Polarity | RT (min) | Equation                        | R2     |
|----------------------|-------------|--------------|-----------------------|----------|----------|---------------------------------|--------|
| Phloretin            | 274.125     | 167.912      | 19                    | (-)      | 16.27    | $y = -0.000383945 + 1.55783x$   | 0.9997 |
| Phloridzin           | 436.243     | 273.890      | 19                    | (-)      | 9.13     | $y = -0.011024 + 1.32396x$      | 0.9991 |
| Xanthoxumol          | 354.240     | 234.027      | 21                    | (-)      | 31.82    | $y = -0.00111669 + 0.00335894x$ | 0.9999 |
| <i>Lignans</i>       |             |              |                       |          |          |                                 |        |
| Lariciresinol        | 360.220     | 329.991      | 12                    | (-)      | 9.98     | $y = 0.0036846 + 0.00281203x$   | 0.9999 |
| Matairesinol         | 358.248     | 342.987      | 23                    | (-)      | 15.88    | $y = 0.00292574 + 0.0239047x$   | 0.9992 |
|                      |             | 82.914       |                       |          |          |                                 |        |
| Secoisolariciresinol | 362.276     | 361.511      | 11                    | (-)      | 9.4      | $y = 0.00211407 + 0.247818x$    | 0.9988 |
|                      |             | 165.755      |                       |          |          |                                 |        |
| <i>Coumestan</i>     |             |              |                       |          |          |                                 |        |
| Coumestrol           | 268.134     | 239.903      | 26                    | (-)      | 17.23    | $y = 0.000117777 + 0.39815x$    | 0.9995 |
| <i>Phenylethanol</i> |             |              |                       |          |          |                                 |        |
| Hydroxytyrosol       | 154.132     | 124.083      | 17                    | (-)      | 2.25     | $y = 0.000895668 + 0.106669x$   | 0.9992 |
| <i>Stilbenoids</i>   |             |              |                       |          |          |                                 |        |
| Polydatin            | 390.231     | 227.693      | 20                    | (-)      | 5.94     | $y = -0.0120849 + 4.16746x$     | 0.9991 |
| Reveratrol           | 228.014     | 184.140      | 24                    | (-)      | 11.41    | $y = 0.00125676 + 0.00646586x$  | 0.9992 |
| Internal Standard    | 182.748     | 136.996      | 26                    | (-)      | 15.68    |                                 |        |

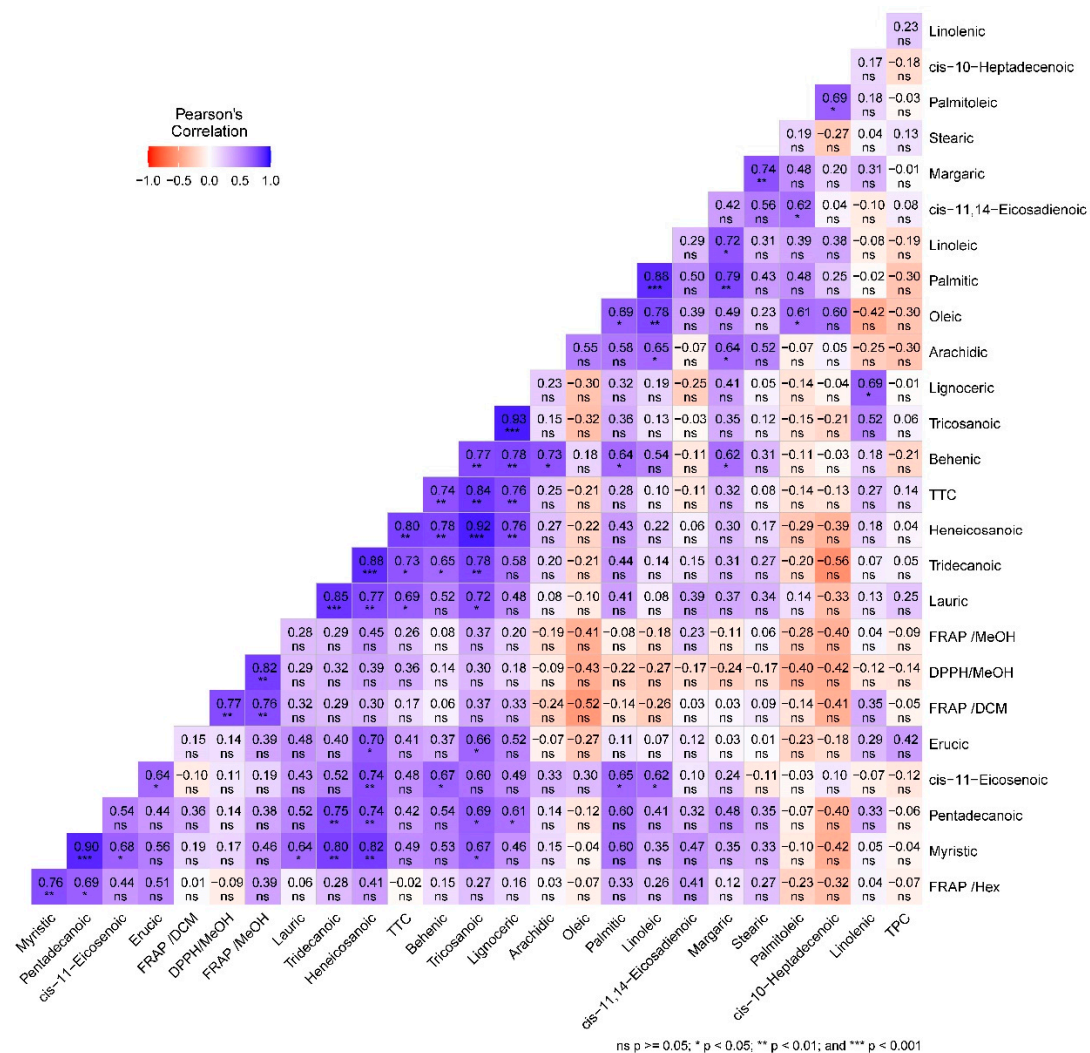

**Figure S1:** Matrix of the Pearson correlation coefficients.



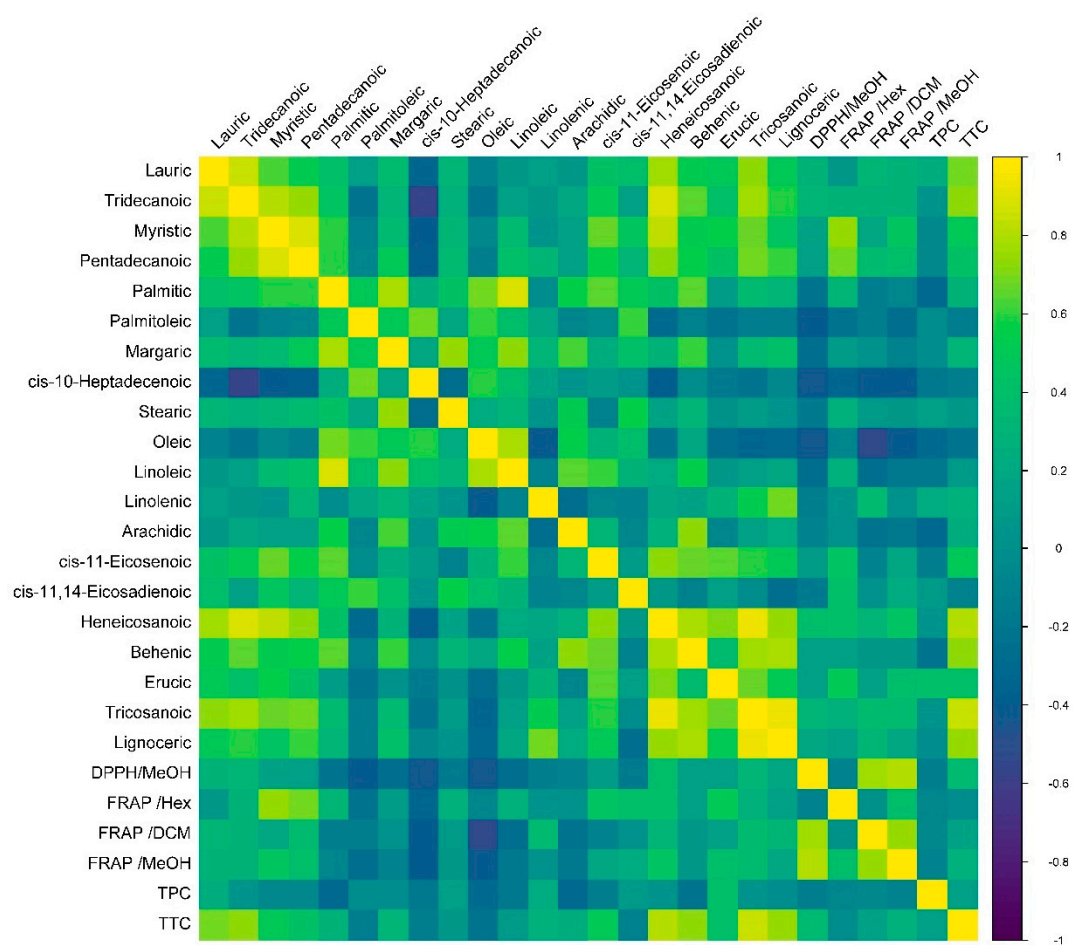

**Figure S2** Correlation heatmap depicting the relationships between phytochemical components and antioxidant properties.
